# Supplementary material for: Regional Variations in Growth Plate Chondrocyte Deformation as Predicted By Three-Dimensional Multi-Scale Simulations
Source: PubMed Central journal article supplement (PMC4401775; doi:10.1371/journal.pone.0124862), 2015-04-17
Supplement: pone.0124862.s001.pdf [file pone.0124862.s001.pdf]

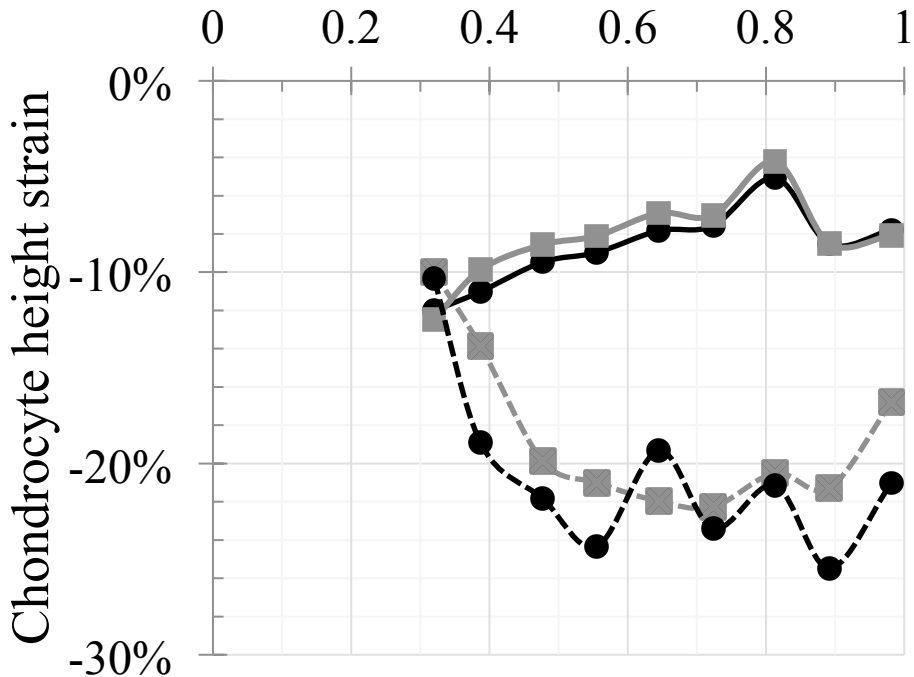

Depth normalized to GP thickness (mm/mm)

- Reserve Zone E=0.42 MPa at P3
- Reserve Zone E=0.42 MPa at P4
- Reserve Zone E=0.98 MPa at P3
- Reserve Zone E=0.98 MPa at P4
